# Supplementary material for: Formylpeptide receptors are critical for rapid neutrophil mobilization in host defense against Listeria monocytogenes
Source: PubMed Central journal article supplement — Sci Rep. 2012 Nov 8;2:786. doi: 10.1038/srep00786 (PMC3493074; doi:10.1038/srep00786), 2012-11-08
Supplement: srep00786-s1.pdf [file srep00786-s1.pdf]

**Formylpeptide receptors are critical for rapid neutrophil mobilization in host defense against *Listeria monocytogenes***

Mingyong Liu, Keqiang Chen, Teizo Yoshimura, Ying Liu, Wanghua Gong, Aimin Wang, Ji-Liang Gao, Philip M. Murphy, and Ji Ming Wang

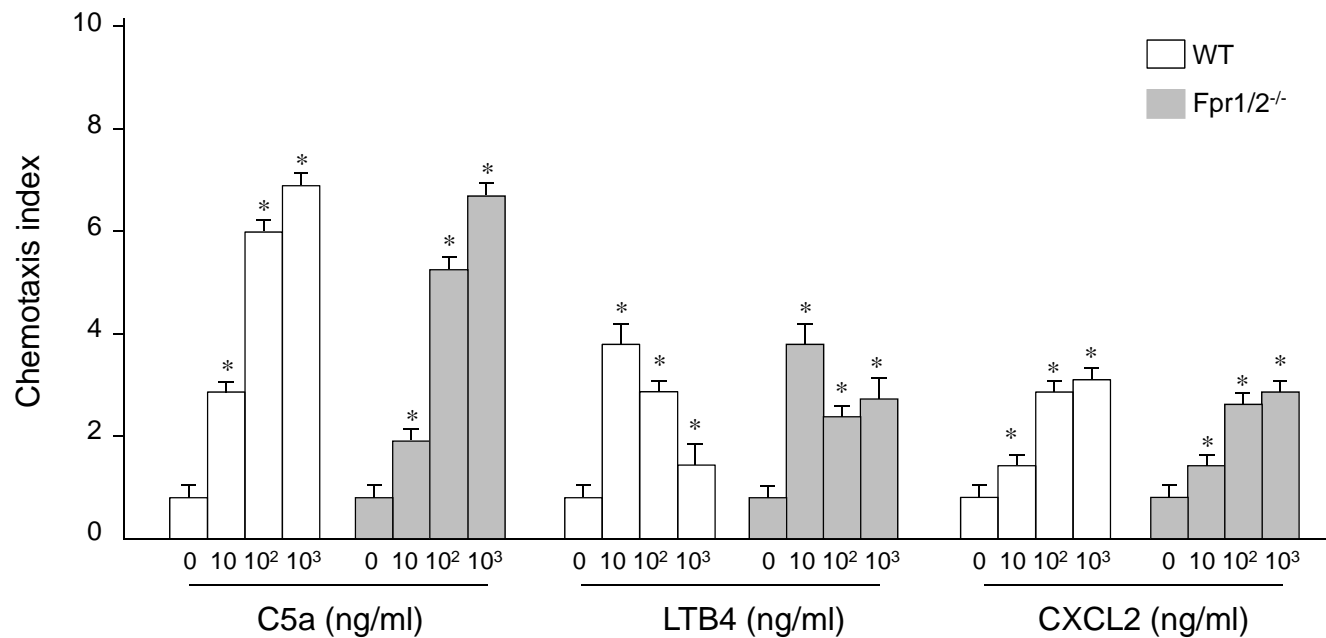

**Supplementary Figure 1. Chemotaxis of WT and Fpr1/2<sup>-/-</sup> mouse neutrophils in response to chemoattractants not using Fprs.** WT and mFRP1/2<sup>-/-</sup> mouse neutrophils ( $1.5 \times 10^6$ /ml) were measured for chemotaxis in response to activated complement component C5a, leukotriene B4 (LTB4) or the chemokine CXCL2. \* significantly increased cell migration in response to the chemoattractants as compared with response to medium control (0) ( $p = 0.007$ ).

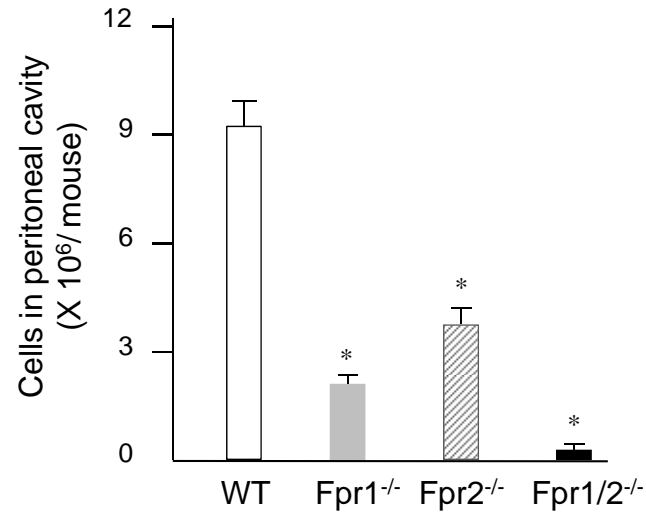

**Supplementary Figure 2. Accumulation of neutrophils in the peritoneal cavity of Fpr-deficient mice.** *Listeria* ( $5 \times 10^5$ ) were injected into mouse peritoneal cavity. Exudating neutrophils were collected and analyzed with flow cytometry at 3 h after injection. \* significantly decreased neutrophil numbers in the peritoneal cavity of Fpr-deficient mice as compared with WT mice ( $p = 0.006$ ).

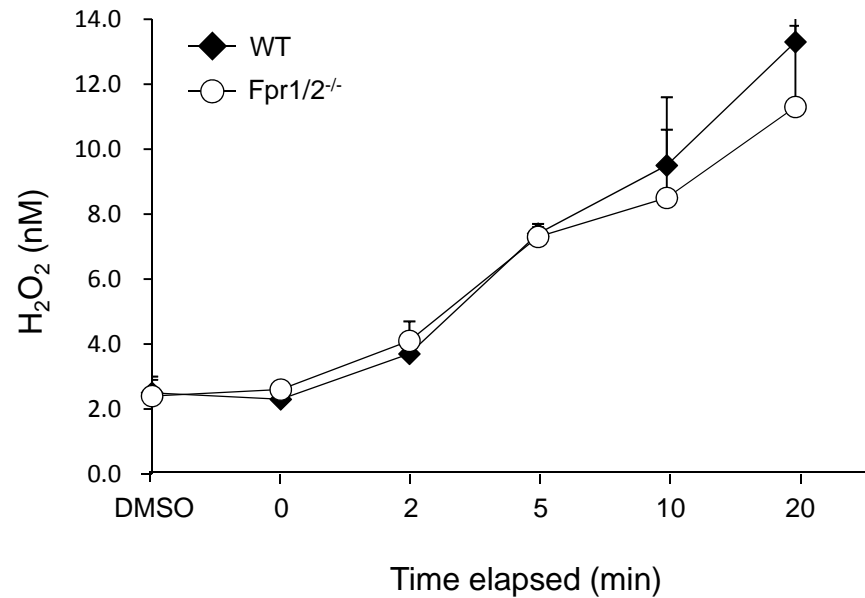

**Supplementary Figure 3. PMA-induced H<sub>2</sub>O<sub>2</sub> production by WT and Fpr-deficient mouse neutrophils.** Neutrophils ( $5 \times 10^6$ ) from WT and Fpr1/2<sup>-/-</sup> mice were primed with 1 ng/ml GM-CSF for 60 minutes then were stimulated with PMA (50 ng/ml) at 37°C. The H<sub>2</sub>O<sub>2</sub> production was measured by spectroscopy at 550 nm. H<sub>2</sub>O<sub>2</sub> was expressed in nanomoles of O<sub>2</sub><sup>-</sup> produced by  $1 \times 10^6$  cells.
